# Supplementary material for: Identification of Bacterial Target Proteins for the Salicylidene Acylhydrazide Class of Virulence-blocking Compounds
Source: PubMed Central journal article supplement — J Biol Chem. 2011 Jul 1;286(34):29922–31. doi: 10.1074/jbc.M111.233858 (PMC3191033; doi:10.1074/jbc.m111.233858), 2011-07-01

## Figure S2

### Analysis of protein secretion by *Yersinia pseudotuberculosis*.

| Ladder | wt | wt      | $\Delta$ Tpx | $\Delta$ Tpx | $\Delta$ WrbA | $\Delta$ WrbA |
|--------|----|---------|--------------|--------------|---------------|---------------|
|        |    | +ME0052 |              | +ME0052      |               | +ME0052       |

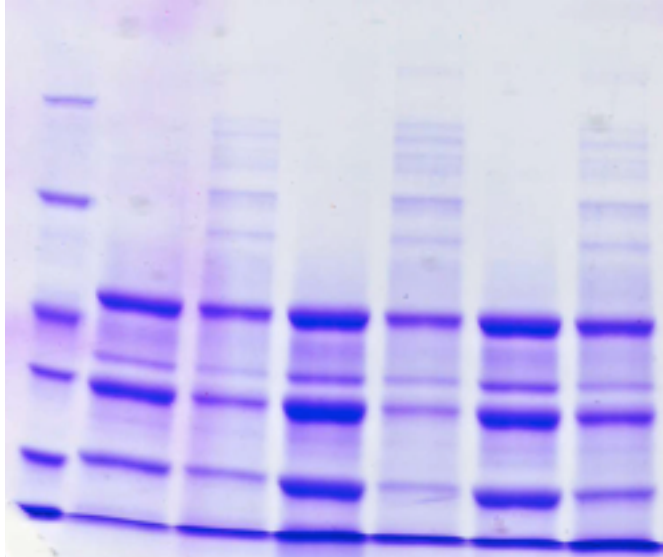

Supplement: supp_M111.233858_jbc.M111.233858-3.pdf [file supp_M111.233858_jbc.M111.233858-3.pdf]
