# Supplementary material for: Identification of Bacterial Target Proteins for the Salicylidene Acylhydrazide Class of Virulence-blocking Compounds
Source: PubMed Central journal article supplement — J Biol Chem. 2011 Jul 1;286(34):29922–31. doi: 10.1074/jbc.M111.233858 (PMC3191033; doi:10.1074/jbc.m111.233858), 2011-07-01
Supplement: supp_M111.233858_jbc.M111.233858-9.pdf [file supp_M111.233858_jbc.M111.233858-9.pdf]

**Table S2**

Oligonucleotide primers.

| Primer Name  | Application | Sequence                           |
|--------------|-------------|------------------------------------|
| folX-5       | pDW112      | CACCATGGCACAACCTGCCGC              |
| folX-3       | pDW112      | TTAACGCTGCCAGCTTAAGG               |
| Z2714-5      | pDW114      | CACCATGATATGGAAACGAAAAATC          |
| Z2714-3      | pDW114      | TCACAAAATGGCGGTTCGTCATC            |
| Z3974-5      | pDW115      | CACCATGACTACATTACGTCAGC            |
| Z3974-3      | pDW115      | TTACATCCGCATGGAAAC                 |
| tpx-5        | pDW111      | CACCATGTCACAAACCGTTCATTTTC         |
| tpx-3        | pDW111      | TTATGCTTTTCAGTACAGCCAG             |
| wrbA-5       | pDW113      | CACCATGGCACGCGCAGTCGC              |
| wrbA-3       | pDW113      | TTAGCCATTAAGTTTAACTGCC             |
| stcE5bgl     | pDW116      | GAAGATCTATGAACACTAAAATGAATGAGAG    |
| stcE3Hind    | pDW116      | CCCAAGCTTTTATTTATATACAACCCTCATTGAC |
| Tpxlh-5Hind  | pDW132      | CCCAAGCTTACTGACCTGCGGCACCAG        |
| Tpxlh-3bamH  | pDW132      | CGGGATCCTTGTGACATGATTATCTTTCCTG    |
| Tpxrh-5BamH  | pDW133      | CGGGATCCGTTAATATGCCTGATGGTGTTG     |
| Tpxrh-3Kpn   | pDW133      | GGGGTACCGCCGCCAGGACGTCAGC          |
| wrbAlh-5Hind | pDW138      | CCCAAGCTTGACCAGAGATGAGTTTAGCC      |
| wrbAlh-3BamH | pDW138      | CGGGATCCCGCGTGCCATCGTTTCAACA       |
| wrbArh-5bamH | pDW139      | CGGGATCCTTCAACAGGAGGATACGC         |
| wrbArh-3kpn  | pDW139      | GGGGTACCTTTCCGATGGATCAGGTGG        |
| folXlh-5kpn  | pDW135      | GGGGTACCAAATGTTACCCGCTGTGAG        |
| folXlh-3xma  | pDW135      | TCCCCCGGGCCATTGCAGTTCTCCGTTG       |
| folXrh-5BamH | pDW136      | CGGGATCCCCTTAAGCTGGCAGCGTTAAC      |
| folXrh-3Hind | pDW136      | CCCAAGCTTGCCACTAACCTGTAACACC       |
| wrbASF5      | pDW126      | CACCATGGCTAAAGTTCTGGTGC            |
| wrbASF3      | pDW126      | TTAGCCGTTAAGTTTAACTG               |
| wrbAST5      | pDW129      | CACCATGGCAAAGATTCTGGTGC            |
| wrbAST3      | pDW129      | TTAGCCGTTGAGTTTGACTG               |
| wrbAYP5      | pDW123      | CACCATGGCGAAAATTTAGTACTC           |
| wrbAYP3      | pDW123      | TCAACCCTTCAGCTTGCC                 |
| wrbAPA5      | pDW142      | CACCTTGAGCAGTCCCTACATCC            |
| wrbAPA3      | pDW142      | TCAACTCCCCAGCTTGCCG                |
| tpxST5       | pDW127      | CACCATGTCACAGACTGTACATTTTC         |
| tpxST3       | pDW127      | TTATGCCTTCAGGACATTAAG              |
| tpxYP5       | pDW121      | CACCATGACACAGACCGTACATTTTC         |
| tpxYP3       | pDW121      | TTATTTTCAGTGCAGCCAGCG              |
| tpxSF5       | pDW124      | CACCATGTCACAAACCGTTCATTTTC         |
| tpxSF3       | pDW124      | TTATGCTTTTCAGTACAGCCAG             |
| tpxPA5       | pDW130      | CACCATGGCTCAAGTGACTCTCAAG          |
| tpxPA3       | pDW130      | TCAGAGAGCCGCCAGGGC                 |
| folXSF5      | pDW125      | CACCATGGCACAACCTGCCGC              |
| folXSF3      | pDW125      | TTAACGCTGCCAGCTTAAGG               |
| folXPA5      | pDW122      | CACCATGCCGCGACTGGAACCG             |
| folXPA3      | pDW122      | TCAGCGGTGGCCGGCGAG                 |
| folBYP5      | pDW143      | CACCATGGACATCGTATTTATTGAGG         |
| folBYP3      | pDW143      | TCAGCTTAGCCGTTGGCCAC               |
| folBPA5      | pDW131      | CACCGTGGACAGAGTTTTTATCGAAG         |
| folBPA3      | pDW131      | TCAGCGACATCCGCGTTTCGATC            |
| folBST5      | pDW128      | CACCGTGATGGATATTGTATTTATAG         |
| folBST3      | pDW128      | TTATTTTCAGATTATTGCCACGC            |
| C61S3-EC     | pDW141-C61S | CGTACTGATGCGGCCGAAACACCGGTATC      |
| C61S5-EC     | pDW141-C61S | GATACCGGTGTTTCGGCCGCATCAGTACG      |
| C61S3-YP     | pDW121-C61S | CGTACCGAGGCGGCCGAAACGCCGGTATC      |
| C61S5-YP     | pDW121-C61S | GATACCGGCGTTTCGGCCGCCTCGGTACG      |
| 16s5q        | qPCR        | ATTGACGTTACCCGCAGAAG               |
| 16s3q        | qPCR        | CGCTTTACGCCAGTAATTC                |

|            |        |                               |
|------------|--------|-------------------------------|
| gapA5q     | qPCR   | GGGACGAAGTTGGTGTTGAC          |
| gapA3q     | qPCR   | AACCACTTTCTTCGCACCAG          |
| escJ5q     | qPCR   | TTAGTGGCATCGCCATCAC           |
| escJ3q     | qPCR   | CTGCAATCGATAACACCAGGTA        |
| fliC5q     | qPCR   | CAGCAGGTAATACACCATCG          |
| fliC3q     | qPCR   | GCTTTAGCTGCGCTACCAGC          |
| tpx5BamHI  | pDW144 | CGGGATCCTAGGTGTGACGTAACTATATG |
| tpx3EcoRI  | pDW144 | CGGAATTCTTATGCTTTCAGTACAGCCAG |
| folX5BamHI | pDW145 | CGGGATCCGTTCTCGTGTATTATTCATCC |
| folX3EcoRI | pDW145 | CGGAATTCTTAACGCTGCCAGCTTAAGG  |
| wrbA5BamHI | pDW146 | CGGGATCCGCTACGGAATAGAGATAACAC |
| wrbA3EcoRI | pDW146 | CGGAATTCTTAGCCATTAAGTTAACTGCC |
