# Supplementary figures and images for: Identification of Bacterial Target Proteins for the Salicylidene Acylhydrazide Class of Virulence-blocking Compounds
Source: PubMed Central journal article supplement — J Biol Chem. 2011 Jul 1;286(34):29922–31. doi: 10.1074/jbc.M111.233858 (PMC3191033; doi:10.1074/jbc.m111.233858), 2011-07-01

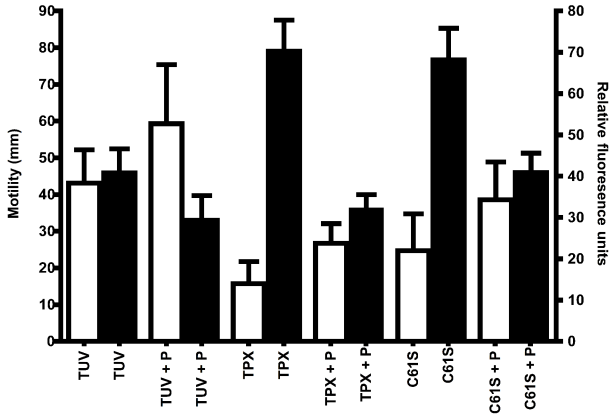

Supplement: supp_M111.233858_jbc.M111.233858-2.pdf [file supp_M111.233858_jbc.M111.233858-2.pdf]
